# Supplementary material for: Multi-channel intraneural vagus nerve recordings with a novel high-density carbon fiber microelectrode array
Source: PubMed Central journal article supplement (PMC7511947; doi:10.1038/s41598-020-72512-7), 2020-09-23
Supplement: 41598_2020_72512_MOESM1_ESM.pdf [file 41598_2020_72512_MOESM1_ESM.pdf]

## SUPPLEMENTARY FIGURES

### **Title:**

Multi-channel intraneural vagus nerve recordings with a novel high-density carbon fiber microelectrode array

### **Authors:**

Ahmad A. Jiman<sup>1,2,3</sup>, David C. Ratze<sup>2,4</sup>, Elissa J. Welle<sup>1,2</sup>, Paras R. Patel<sup>1,2</sup>, Julianna M. Richie<sup>1,2</sup>, Elizabeth C. Bottorff<sup>1,2</sup>, John P. Seymour<sup>1,4,5</sup>, Cynthia A. Chestek<sup>1,2,4</sup>, Tim M. Bruns<sup>1,2,\*</sup>

1- Department of Biomedical Engineering, University of Michigan, Ann Arbor, MI, USA

2- Biointerfaces Institute, University of Michigan, Ann Arbor, MI, USA

3- Department of Electrical and Computer Engineering, King Abdulaziz University, Jeddah, Saudi Arabia

4- Department of Electrical Engineering and Computer Science, University of Michigan, Ann Arbor, MI, USA

5- Department of Neurosurgery, University of Texas Health Science Center, Houston, TX, USA

### \*Corresponding Author:

Tim M. Bruns, Ph.D.

NCRC - B10 - A-169

2800 Plymouth Road

Ann Arbor, MI 48109, USA

Phone: (734) 647-8727

Email: [bruns@umich.edu](mailto:bruns@umich.edu)

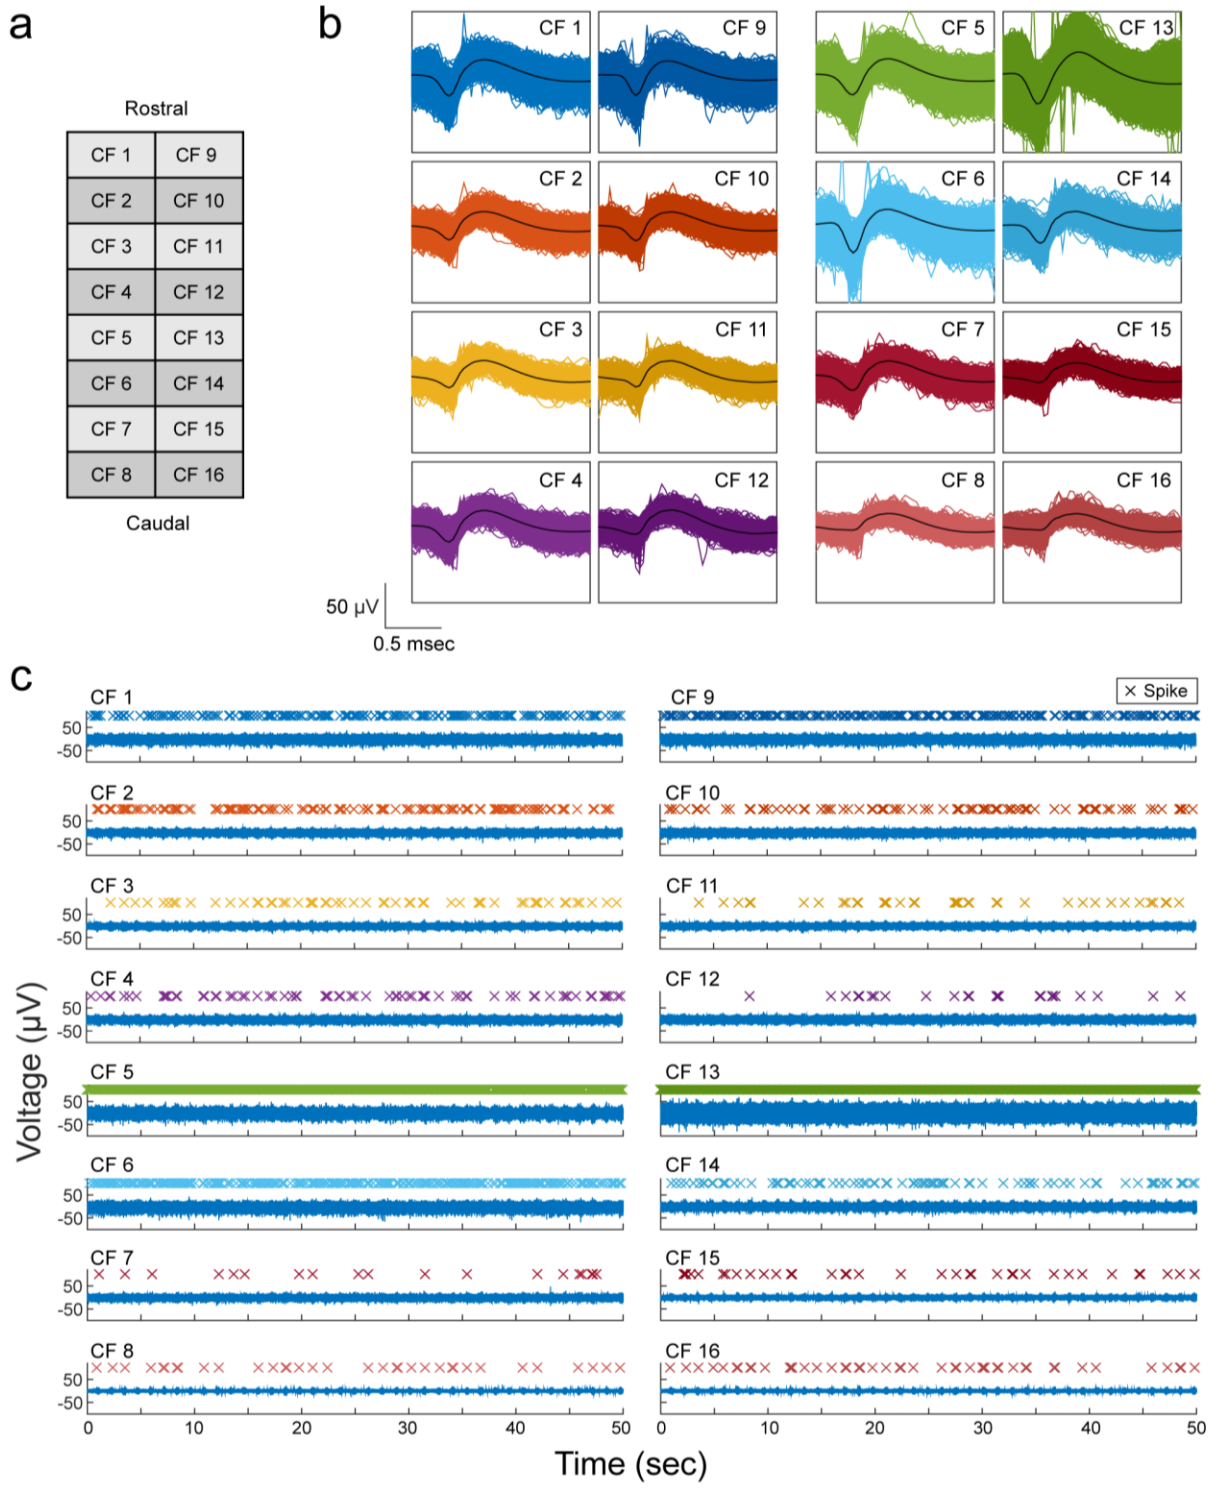

**Supplementary Figure S1. Carbon Fiber Microelectrode Array (CFMA) with neural activity on all recording carbon fibers (CFs).** (a) The CF layout in a CFMA. (b) Sorted neural cluster on each CF. (c) Segment of filtered signal on each CF. The firing of spikes are unique across CFs.

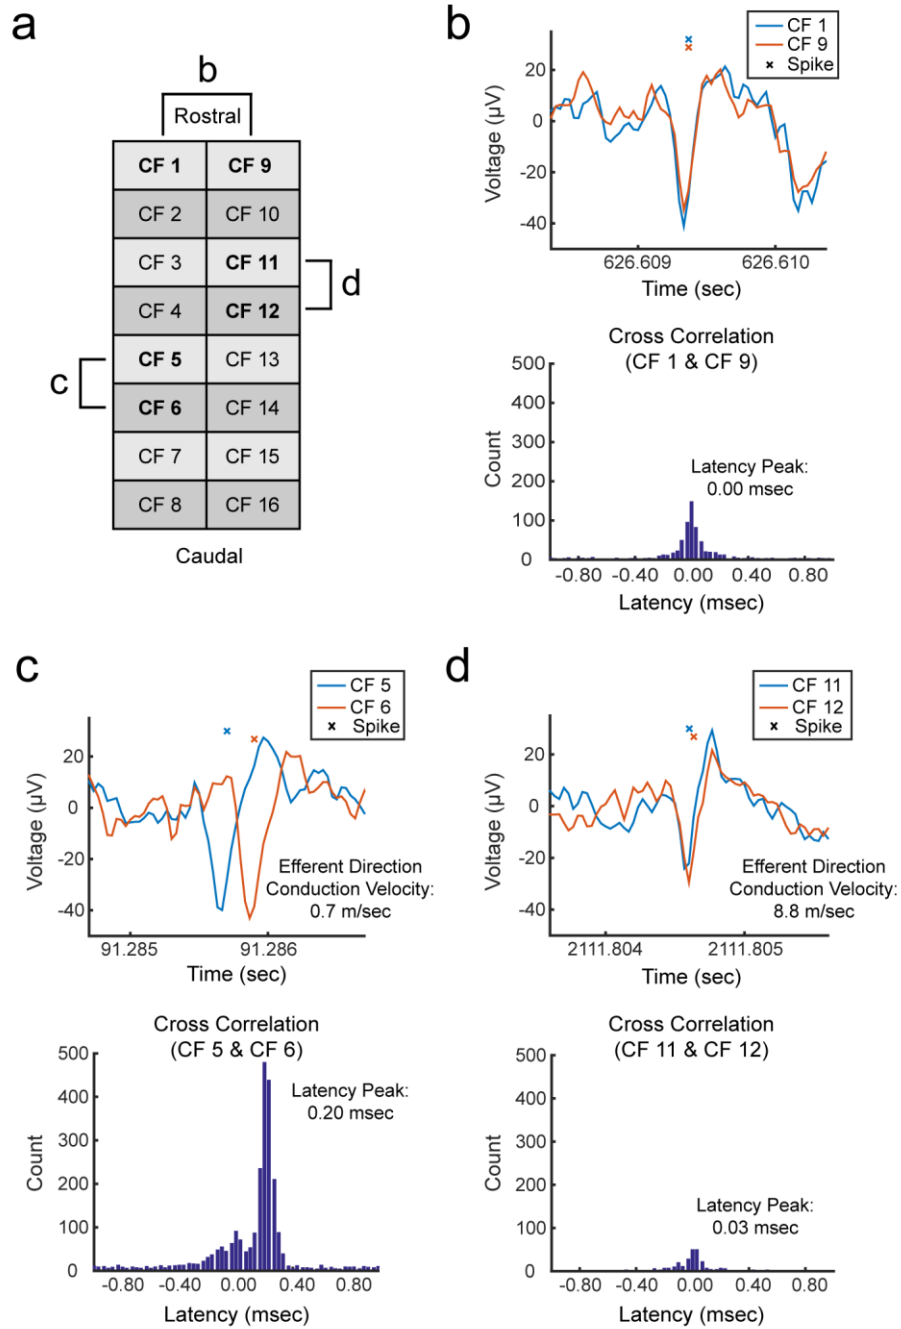

**Supplementary Figure S2. Neural recording on opposite rows of a CFMA.** (a) The 2-row carbon fiber (CF) configuration in a CFMA. (b) Two CFs on opposite rows showing coinciding spikes with different amplitudes, suggesting that these spikes are generated from a neuron located between these opposite carbon fibers. (c) Adjacent carbon fibers showing propagating spikes in the efferent direction at a conduction velocity of 0.7 m/sec along one row of a CFMA. (d) Propagating spikes on the other row with a conduction velocity of 8.8 m/sec in the efferent direction. The propagating spikes in c and d are independent of each other.

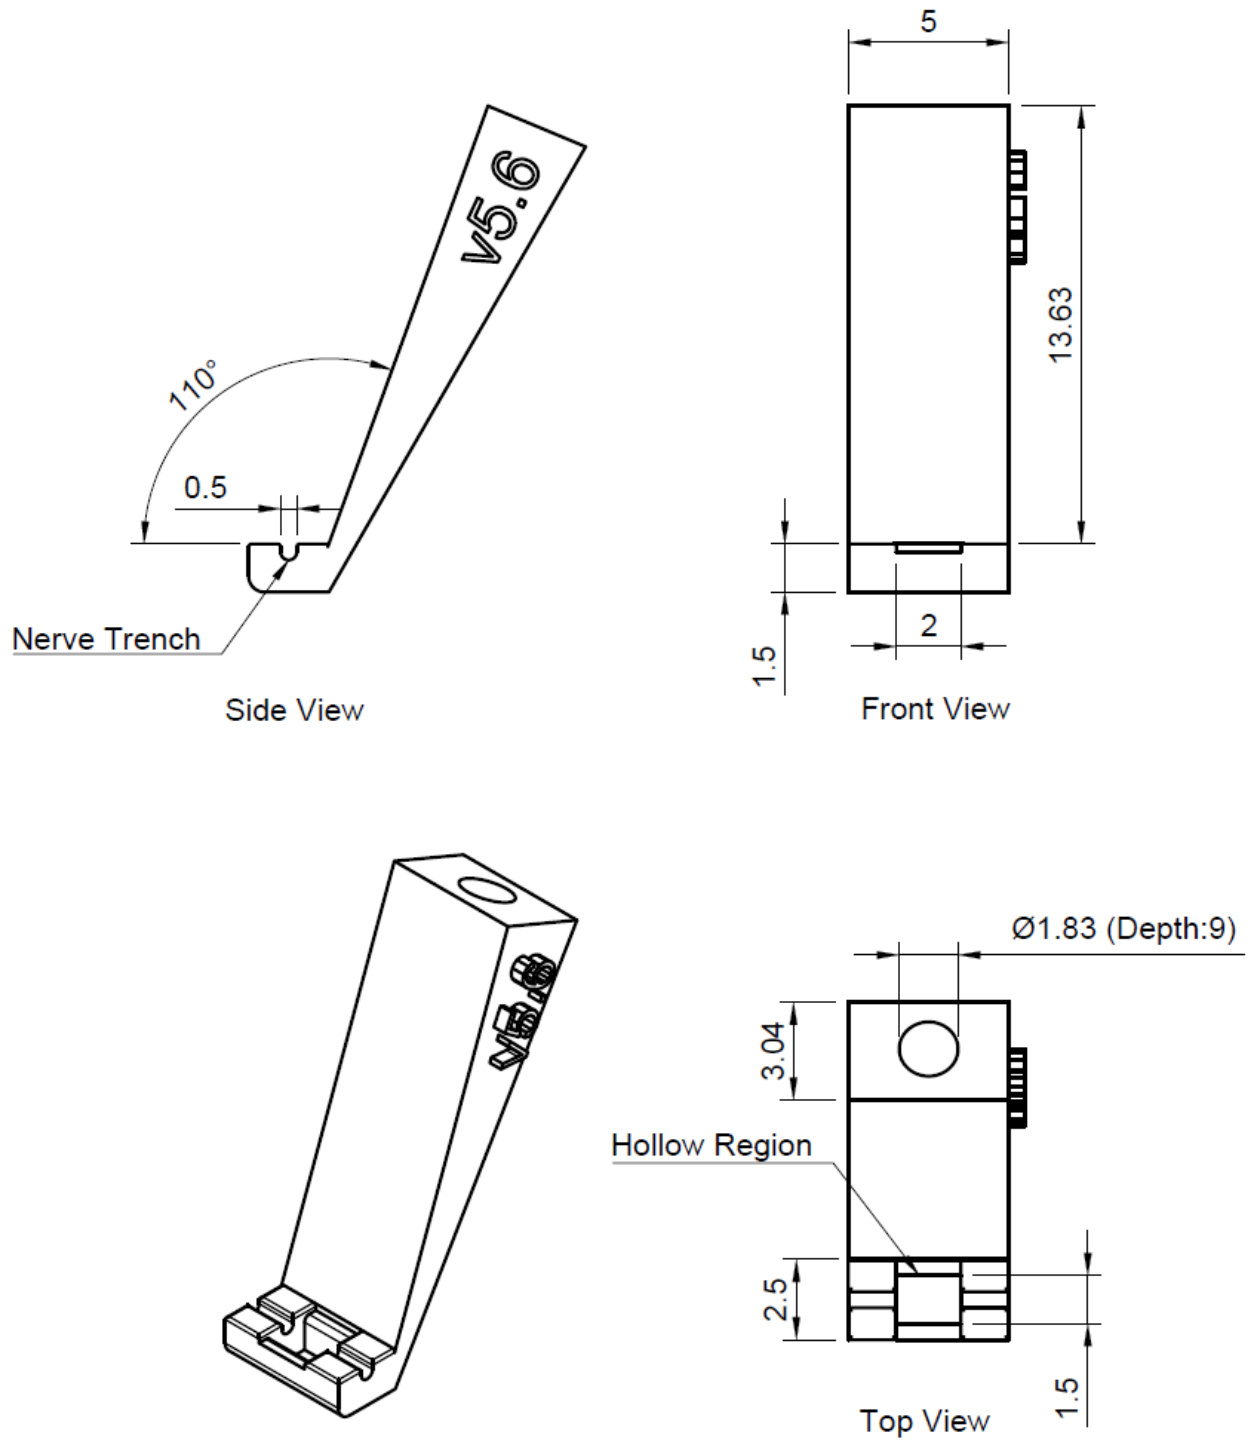

**Supplementary Figure S3. Nerve-holder design for inserting CFMA in a rat cervical vagus nerve. Dimensions are in millimeters (mm).**
